# Supplementary material for: A ZIF-8-based dual-modal smart responsive nanoplatform for overcoming radiotherapy resistance in advanced tumors
Source: Royal Society of Chemistry journal article supplement (doi:10.1039/d5nr01093d), 2025-01-01
Supplement: d5nr01093d1.pdf [file d5nr01093d1.pdf]

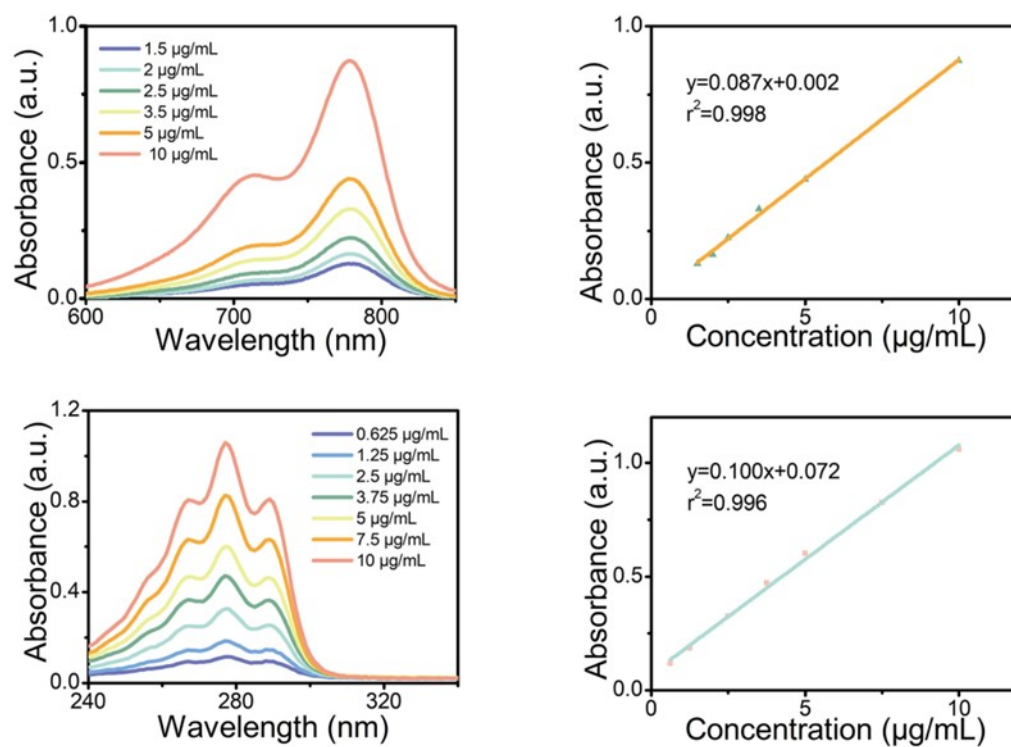

Figure s1. UV-VIS spectra of free ICG and free Rapamycin at different concentrations and corresponding standard curves.

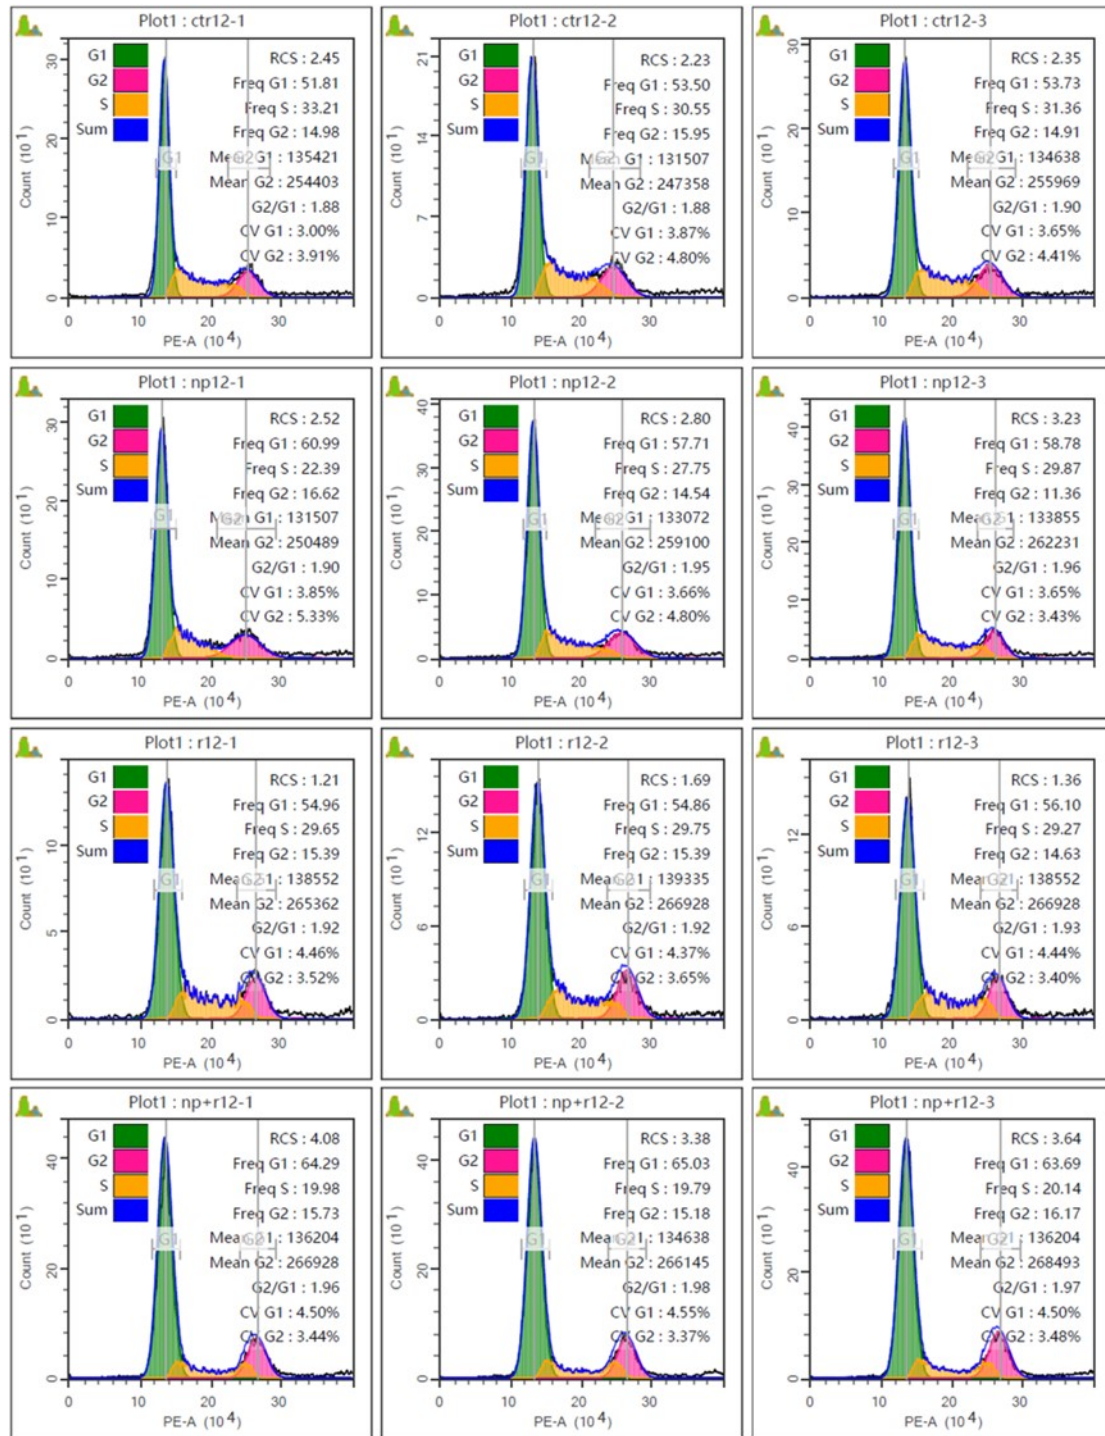

Figure s2. The effects of RIZM NPs under X-ray irradiation (6 Gy) on the cell cycle of HepG2 tumor cells treated for 12 h.

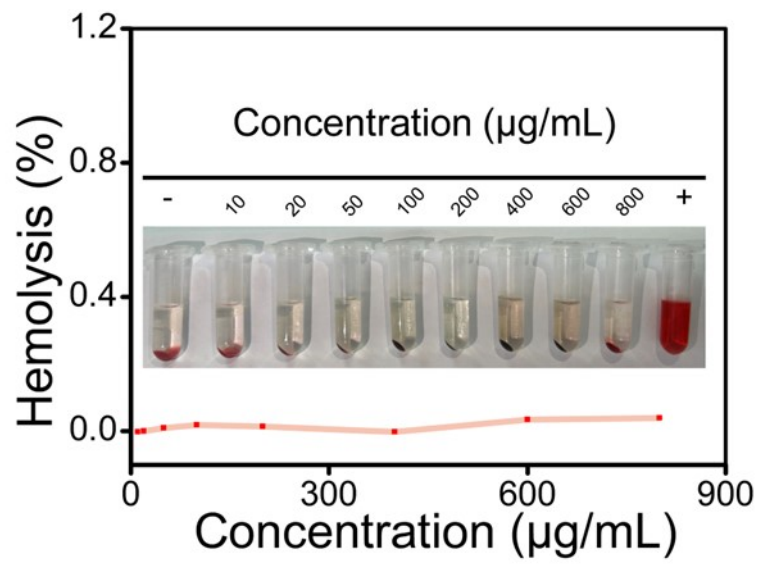

Figure s3.Hemolytic activity analysis of RIZM NPs.

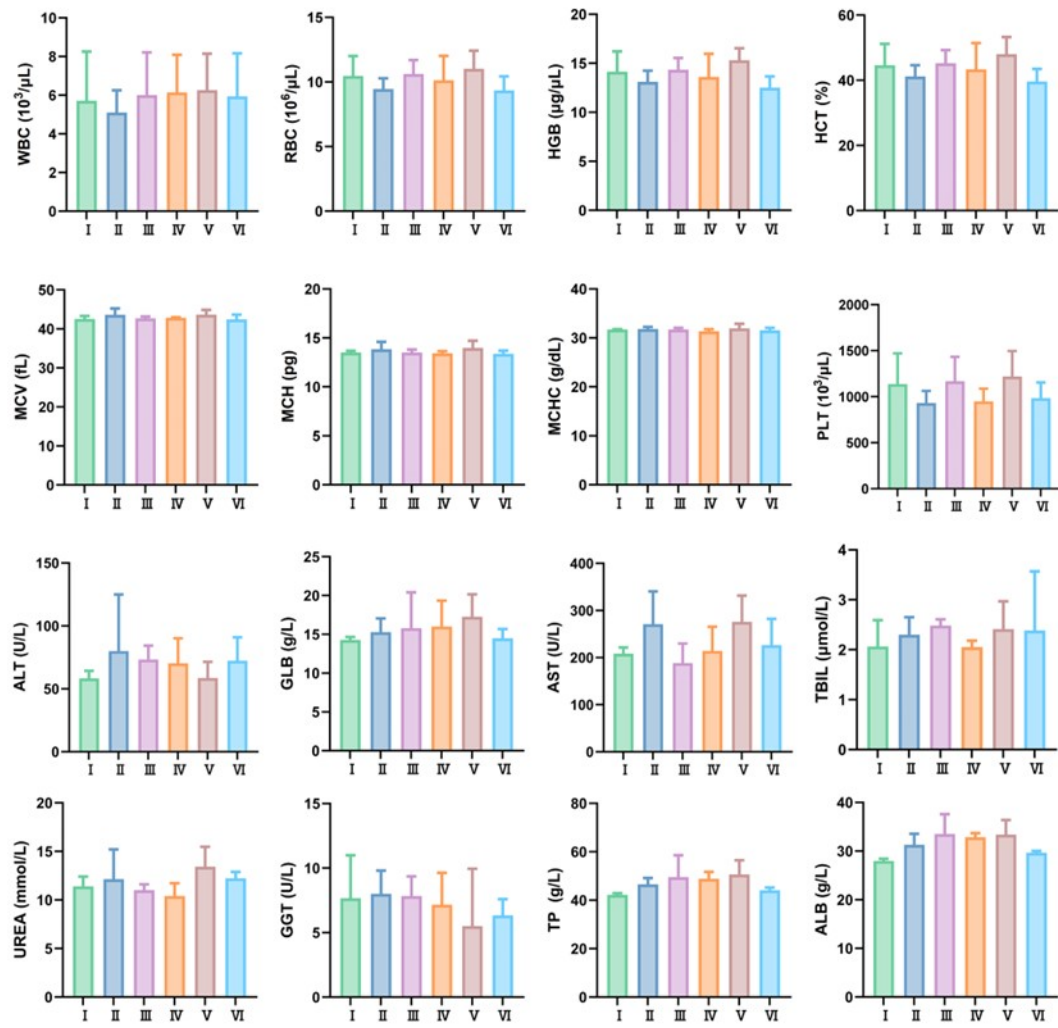

Figure s4. Whole blood cell and Blood biochemistry analysis of the mice after treatments.

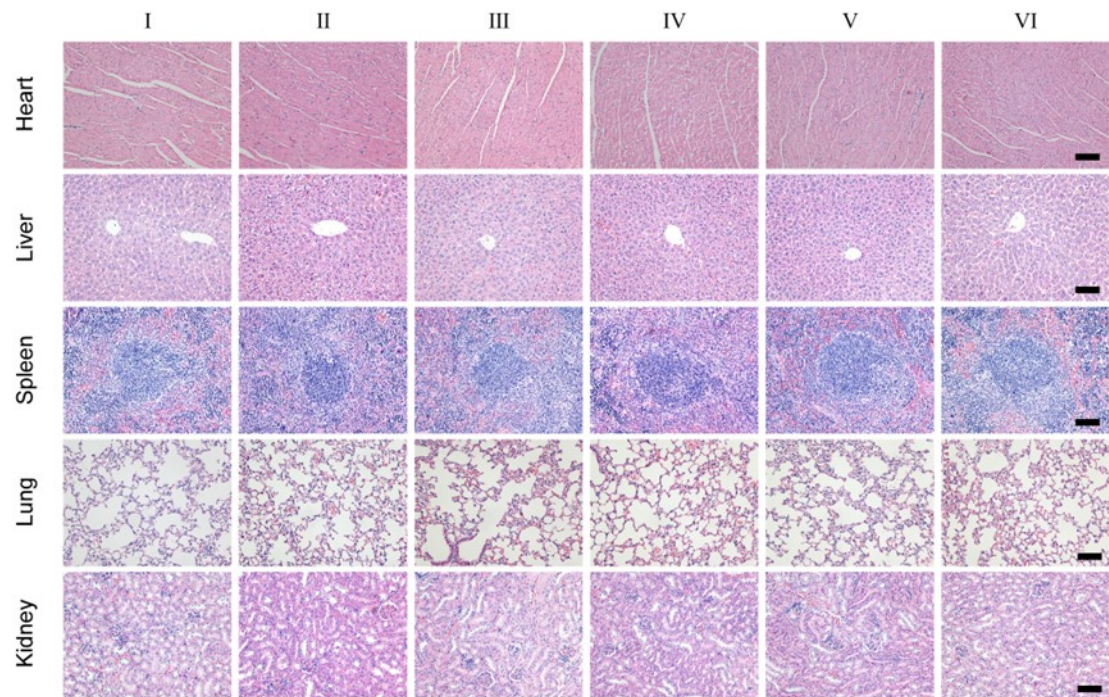

Figure s5. H&E staining of sectioned organs after treatments
